# Supplementary material for: Magnetite Nanoparticles Functionalized with RNases against Intracellular Infection of Pseudomonas aeruginosa
Source: Pharmaceutics. 2020 Jul 6;12(7):631. doi: 10.3390/pharmaceutics12070631 (PMC7408537; doi:10.3390/pharmaceutics12070631)
Supplement: Supplementary file 1 [file pharmaceutics-12-00631-s001.pdf]

# Supplementary Materials: Magnetite Nanoparticles Functionalized with RNases against Intracellular Infection of *Pseudomonas aeruginosa*

Nathaly Rangel-Muñoz, Alejandra Suarez-Arnedo, Raúl Anguita, Guillem Prats-Ejarque, Johann F. Osma, Carolina Muñoz-Camargo, Ester Boix, Juan C. Cruz and Vivian A. Salazar

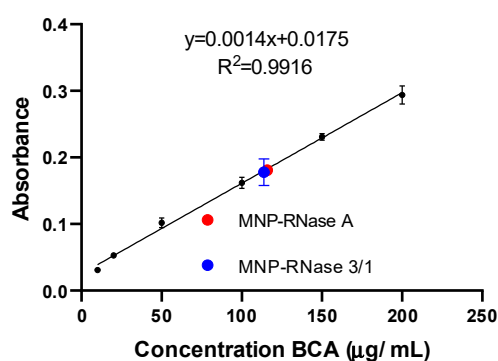

**Figure S1.** Total protein quantification (BCA assay) upon immobilization of both RNases on MNPs. We used 500 μg/mL of nanobioconjugates and established a percentage of 22.77% of RNase 3/1 and 23.19% of RNase A on the surface of the nanobioconjugates [ $n = 3$ ].

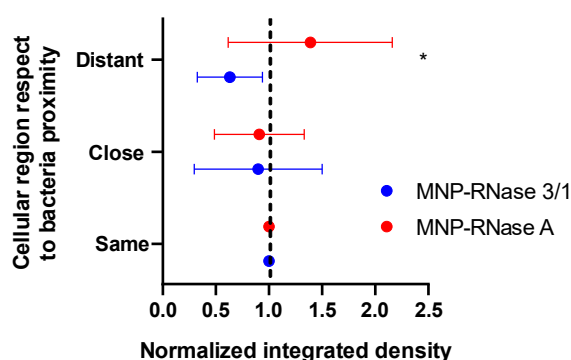

**Figure S2.** Normalized integrated density of nanobioconjugates on different cellular regions with respect to the distance to bacteria. Each value was normalized respect to the integrated density of nanobioconjugates colocalized with bacteria [same: nanobioconjugate colocalized with bacteria, close: nanobioconjugates located near to bacteria (less than 1 μm) and distant: nanobioconjugates located ≥2 μm from bacteria]. Significant differences between locations and MNP-RNases were estimated with the Two-Way ANOVA and Dunnett tests. \*  $p$ -value < 0.05 ( $n = 10$  bacteria inside the cells).
